# Supplementary material for: What caused the interdecadal shift of the ENSO impact on dust mass concentration over northwestern South Asia?
Source: Copernicus journal article supplement (doi:10.5194/acp-2022-204), 2022-03-22
Supplement: Supplementary file 1 [file acp-2022-204-supplement.pdf]

1 **What caused the interdecadal shift of the ENSO impact**  
2 **on dust mass concentration over northwestern South Asia?**

3

4 Lamei Shi <sup>1,2</sup>, Jiahua Zhang <sup>1,2,\*</sup>, Fengmei Yao <sup>2</sup>, Da Zhang <sup>1,2</sup>, Jingwen Wang <sup>1,2</sup>,  
5 Xianglei Meng<sup>2</sup>, Yuqin Liu<sup>3</sup>

6 <sup>1</sup>Key Laboratory of Digital Earth Science, Aerospace Information Research Institute, Chinese Academy  
7 of Sciences, Beijing 100094, China

8 <sup>2</sup>College of Earth and Planetary Sciences, University of Chinese Academy of Sciences, Beijing 101407,  
9 China

10 <sup>3</sup>Key Laboratory of Urban Environment and Health, Institute of Urban Environment, Chinese Academy  
11 of Sciences, Xiamen 361021, China

12

13

14

15

16 *Correspondence to:* Jiahua Zhang ([zhangjh@radi.ac.cn](mailto:zhangjh@radi.ac.cn))

17

18

19

20

21

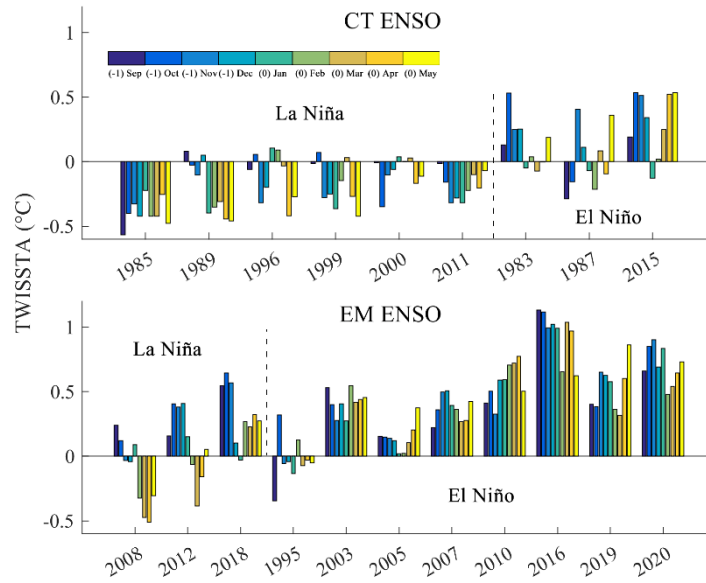

22  
23 **Figure S1: Monthly ((-1) Sep.–(0) May) SSTA over tropical western Indian ocean separately for CT and EM**  
24 **ENSO years.**

25

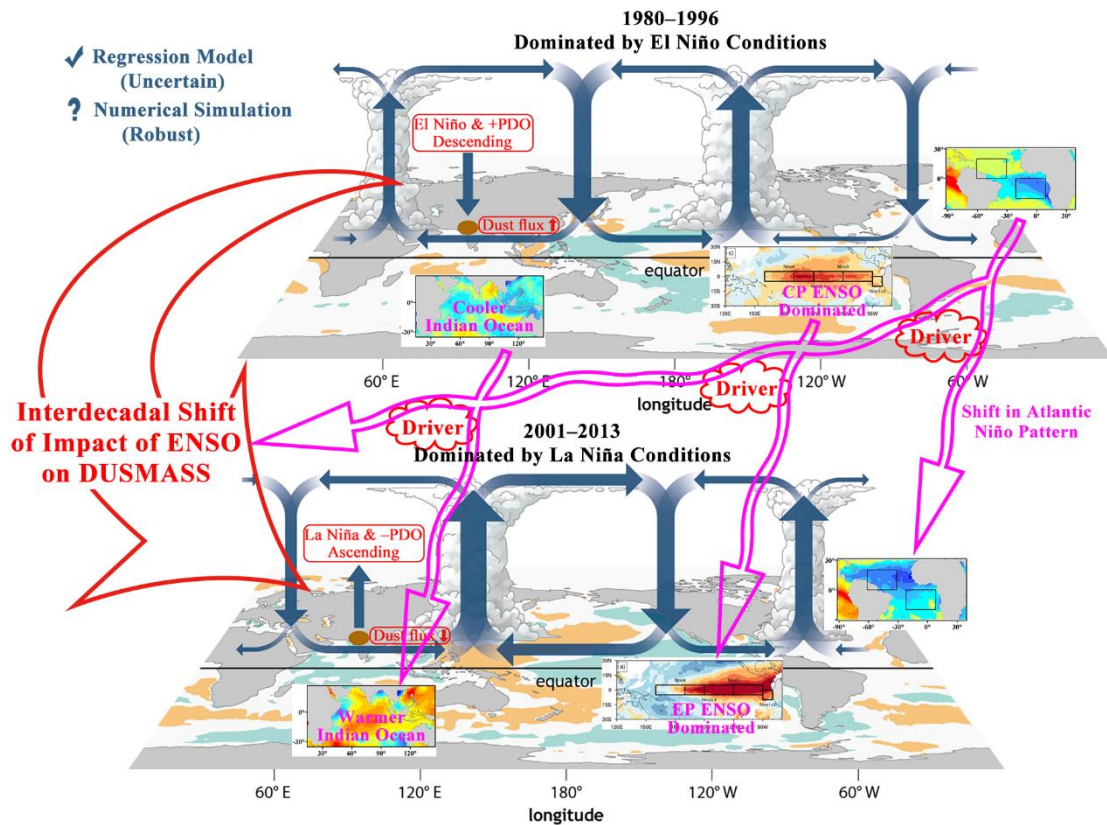

26  
27 **Figure S2: Schematic diagram of the interdecadal shift of the impact of ENSO on DUSMASS and the**  
28 **related drivers. The blue arrows represent the atmospheric circulation over the equator—the Walker**  
29 **circulation. The shades over ocean represent SST. The brown ellipse depicts the study area. (The**  
30 **background map was adopted from NOAA Climate.gov.)**

31
